# Supplementary material
Source: publisher site journal article supplement (https://www.dovepress.com/get_supplementary_file.php?f=318116.docx)
Supplement: Supplementary file 1 [file get_supplementary_file.php]

**Appendix: The Questionnaire**

**Demographic data**

Q1 Are you male or female?

Q2 How old are you?

Q3 Where do you live?

Q4 Do you live alone?

Q5 What is (or was) your last occupational category? (several possibilities given)

Q6 Are you currently employed? (several possibilities given)

**Pathologies**

Q7 What disease(s) do you suffer from (several possibilities given, Hypertension, Cholesterol, Type 2 Diabetes, None of these)?

Q8 Do you suffer from other chronic conditions?

Q9 When was this (these) condition(s) diagnosed?

**Nature of treatment**

Q10 How many times per day must you take medication for this (these) condition(s)?

Q11 How many tablets or capsules (by mouth) do you take per day for this/these condition(s)?

Q12 If you are concerned, how many times do you need to take an injection?

Q13 How many total medications do you take daily for all chronic conditions (Hypertension, Cholesterol, Type 2 Diabetes + other possible conditions)?

Q14 How many times per day must you take all your medications?

**Adherence**

Q15 Did you forget to take your medication this morning?

Q16 Have you run out of medication since the last visit?

Q17 Have you ever taken your medication later than usual?

Q18 Have you ever not taken your medication because you had a memory lapse on certain days?

Q19 Have you ever stopped taking your treatment because some days you feel your treatment is doing more harm than good?

Q20 Do you think you have too much medication to take?

**Intentional adherence**

Q21 When you sometimes do not take your medication, can you give the reason why?

Q22 Do you sometimes deliberately not take your medication?

Q23 What are your reasons for not taking your medication?

**Appreciation of treatment**

Q24 What is your vision of the benefit of your medication?

Q25 Do you think physical activity enhances health?

Q26 Does a balanced diet improve health?

Q27 Has your doctor or pharmacist advised you to be physically active on a regular basis?

Q28 Do you follow their advice?

Q29 Has your doctor or pharmacist advised you about proper nutrition?

Q30 Do you follow their advice?

**Side effects of treatment**

Q31 Have you experienced adverse effects from your medication(s)?

Q32 Are these side effects one reason you do not take your medication regularly?

**Habit**

Q33 Generally speaking, when you are in the habit of doing something, do you stick to it?

Q34Q35 How much do you agree with the following statements about taking your medication?

“I take my medication because I am used to taking it.”

“I do physical activity because I am used to doing it.”

**Patient-physician relationship**

Q36 To what extent do you feel involved in decisions about your treatment?

Q37 To what extent do you feel your doctor understands problems with your treatment? Q37 bis (the specialist)

Q38 To what extent do you feel that your doctor takes your needs into account? Q38 bis (the specialist)

Q39 To what extent would you say there is a relationship of trust between you and your doctor? Q39 bis (the specialist)

Q40 Would you say that your relationship with your doctor influences whether you are taking your medications correctly?

**Other queries**

Q41 Do you share a medical condition(s) with a family member(s)?

Q42 If so, has it influenced whether you follow your treatment?

Q43 Which one?

Q44 What else could interfere with taking your medication regularly?

Q45 From the following list, could you check off the ways in which you remind yourself to take your medications?

Q46 Which of the following people support you in taking your medication(s) correctly? Spouse, Children, Friends, Nurse

Q47 Do you have other tricks for taking your medication every day?

Q48 What are they?

Q49 To what extent do you feel adequately informed about your pathology(ies)?

Q50 To what extent do you feel adequately informed about your medication(s)?
